# Supplementary material for: An Extracellular Redox Signal Triggers Calcium Release and Impacts the Asexual Development of Toxoplasma gondii
Source: PubMed Central journal article supplement (PMC8382974; doi:10.3389/fcimb.2021.728425), 2021-08-10
Supplement: Table_1.pdf [file Table_1.pdf]

| Gene ID (ToxoDB) | Gene annotation                                                     | Predicted localisation | Publication indicating redox function |
|------------------|---------------------------------------------------------------------|------------------------|---------------------------------------|
| TGME49_204480    | thioredoxin domain-containing protein                               | apicoplast             | no                                    |
| TGME49_209950    | thioredoxin domain-containing protein                               | apicoplast             | no                                    |
| TGME49_216510    | thioredoxin, putative                                               | mitochondria-membrane  | no                                    |
| TGME49_218530    | PITH domain-containing protein                                      | cytosol                | no                                    |
| TGME49_240500    | PITH domain-containing protein                                      | 19S proteasome         | no                                    |
| TGME49_224060    | thioredoxin, putative                                               | golgi                  | no                                    |
| TGME49_247350    | thioredoxin domain-containing protein                               | ER                     | no                                    |
| TGME49_269950    | thioredoxin domain-containing protein                               | dense granules         | no                                    |
| TGME49_201800    | thioredoxin domain-containing protein                               | mitochondria-membrane  | no                                    |
| TGME49_247660    | thioredoxin domain-containing protein                               | NA                     | no                                    |
| TGME49_255480    | thioredoxin domain-containing protein                               | NA                     | no                                    |
| TGME49_266620    | thioredoxin domain-containing protein                               | ER                     | yes <sup>(1)</sup>                    |
| TGME49_310770    | hypothetical protein / ATrx2                                        | apicoplast             | yes <sup>(2)</sup>                    |
| TGME49_265510    | hypothetical protein                                                | 19S proteasome         | no                                    |
| TGME49_270120    | thioredoxin-like protein, TLP1                                      | mitochondria-soluble   | no                                    |
| TGME49_289180    | thioredoxin domain-containing protein                               | mitochondria-soluble   | no                                    |
| TGME49_290260    | PITH domain-containing protein                                      | cytosol                | yes <sup>(1)</sup>                    |
| TGME49_291810    | thioredoxin domain-containing protein                               | NA                     | no                                    |
| TGME49_293870    | thioredoxin                                                         | cytosol                | no                                    |
| TGME49_271760    | seryl-tRNA synthetase (SeRS2)                                       | ER                     | no                                    |
| TGME49_270140    | splicing factor DIM1, putative                                      | cytosol                | no                                    |
| TGME49_308050    | phosducin domain-containing protein                                 | NA                     | no                                    |
| TGME49_309730    | thioredoxin reductase                                               | cytosol                | yes <sup>(3)</sup>                    |
| TGME49_247025    | PITH domain-containing protein                                      | NA                     | no                                    |
| TGME49_258826    | thioredoxin domain-containing protein                               | ER                     | no                                    |
| TGME49_312110    | thioredoxin domain-containing protein                               | apicoplast             | yes <sup>(4)</sup>                    |
| TGME49_225060    | thioredoxin domain-containing protein                               | nucleus-chromatin      | no                                    |
| TGME49_211680    | protein disulfide-isomerase                                         | ER                     | yes <sup>(5)</sup>                    |
| TGME49_218470    | protein disulfide-isomerase, putative                               | NA                     | no                                    |
| TGME49_225790    | thioredoxin-like-fold domain-containing protein                     | cytoskeleton           | no                                    |
| TGME49_232410    | thioredoxin-like-fold domain-containing protein                     | cytoskeleton           | no                                    |
| TGME49_238040    | protein disulfide-isomerase domain-containing protein               | ER                     | no                                    |
| TGME49_249270    | protein disulfide isomerase-related protein (provisional), putative | apicoplast             | no                                    |
| TGME49_226800    | GSH-synthase domain-containing protein                              | nucleolus              |                                       |
| TGME49_238070    | glutaredoxin domain-containing protein                              | cytosol                | no                                    |
| TGME49_277790    | glutaredoxin domain-containing protein                              | PM-peripheral          | no                                    |
| TGME49_304660    | glutaredoxin domain-containing protein                              | mitochondria-soluble   | no                                    |
| TGME49_247580    | glutaredoxin domain-containing protein                              | rhoptries              | no                                    |
| TGME49_227150    | glutaredoxin domain-containing protein                              | apicoplast             | no                                    |
| TGME49_279400    | glutaredoxin domain-containing protein                              | cytosol                | no                                    |
| TGME49_268730    | glutaredoxin domain-containing protein                              | mitochondria-soluble   | no                                    |
| TGME49_246920    | glutathione reductase                                               | 19S proteasome         | no                                    |
| TGME49_306030    | glutathione s-transferase, n-terminal domain containing             | ER                     | no                                    |
| TGME49_249630    | glutathione s-transferase, N-terminal domain-containing protein     | mitochondria-soluble   | no                                    |
| TGME49_281630    | lactamase-b domain-containing protein                               | nucleolus              | no                                    |
| TGME49_219130    | NADPH-glutathione reductase                                         | apicoplast             | no                                    |
| TGME49_227100    | glutaredoxin domain-containing protein                              | NA                     | no                                    |
| TGME49_285920    | hypothetical protein                                                | NA                     | no                                    |
| TGME49_309210    | thioredoxin domain-containing protein / peroxiredoxin 6, putative   | cytosol                | no                                    |
| TGME49_230410    | thioredoxin domain-containing protein / peroxiredoxin PRX3          | mitochondria-soluble   | yes <sup>(6,7)</sup>                  |
| TGME49_266130    | glutathione peroxidase / peroxiredoxin PRX2                         | NA                     | yes <sup>(7)</sup>                    |
| TGME49_217890    | peroxiredoxin / alkyl hydroperoxide reductase                       | nucleus                | yes <sup>(8)</sup>                    |
| TGME49_286630    | peroxiredoxin / redoxin domain-containing protein                   | apicoplast             | yes <sup>(8)</sup>                    |
| TGME49_266120    | glutathione peroxidase / thioredoxin-dependent peroxidase TPX1      | PM-peripheral          | yes <sup>(9)</sup>                    |
| TGME49_316330    | superoxide dismutase SOD2                                           | mitochondria-soluble   | yes <sup>(7)</sup>                    |
| TGME49_232250    | catalase                                                            | cytosol                | yes <sup>(7,10,11)</sup>              |
| TGME49_316190    | superoxide dismutase SOD3                                           | NA                     | yes <sup>(7)</sup>                    |
| TGME49_316310    | superoxide dismutase                                                | cytosol                | yes <sup>(12)</sup>                   |
