# Supplementary material for: An Extracellular Redox Signal Triggers Calcium Release and Impacts the Asexual Development of Toxoplasma gondii
Source: PubMed Central journal article supplement (PMC8382974; doi:10.3389/fcimb.2021.728425), 2021-08-10
Supplement: Table_2.pdf [file Table_2.pdf]

| Primer name                         | Primer number | Sequence (5'-3')                                                                                                   |
|-------------------------------------|---------------|--------------------------------------------------------------------------------------------------------------------|
| Fw-GRX1-roGFP2                      | 1             | ctcgttggcatttttcttgatggctcaagagtttgaac                                                                             |
| Rv-GRX1-roGFP2                      | 2             | agtgagcacaacgggtgattactgtacagctcgtccatg                                                                            |
| Fw-GRA8-GRX1-roGFP2                 | 3             | ctcgttggcatttttcttgatggcttaccattgcgtgttt<br>cggccacgggttctgtggtcttcgctgtctttggtgtagct<br>cgcgcatggggaaggtggtgtgttc |
| Fw-GRX1ser23-26                     | 4             | ccagcccaccagcccgtacagcag                                                                                           |
| Rv-GRX1ser23-26                     | 5             | atgaacacaaccacctcccagg                                                                                             |
| Rv-GRA8-GRX1ser23-26                | 6             | atgaacacaaccacctcccat                                                                                              |
| Fw-pTUB8 sequence                   | 7             | cagaagacatccaccaaagc                                                                                               |
| Rv-pTUB8 sequence                   | 8             | gctgcgaaacactcctatttag                                                                                             |
| Fw-jRCaMP1b                         | 9             | actttcgtcgtagtcttaactctactcgtgcatcattgtac                                                                          |
| Rv-jRCaMP1b                         | 10            | tccaggaccaatgctgcagaacgagcttg                                                                                      |
| Fw-5'UTR of GRA1                    | 11            | tgctcaccatcttgctgatttcttcaaag                                                                                      |
| Rv-5'UTR of GRA1                    | 12            | ccggactacgcgtagttaattcgaaggctgtagtactg                                                                             |
| Fw-GFP-T2A-fusion                   | 13            | tctgcagcattggctcctggattttctctacac                                                                                  |
| Rv-GFP-T2A-fusion                   | 14            | atcaagcaagatgggtgagcaagggcgag                                                                                      |
| Fw-HXGPRT cassette                  | 15            | caagaatccccactccaagcatgcaggcgcagctggagaatggcca<br>gaggcaggcatc                                                     |
| Rv-HXGPRT cassette                  | 16            | caaccggctgcatgcacgacgaagacatgtgcacctaagccgaggaa<br>gatccgatctg                                                     |
| Rv-pSag1::CAS9-U6::sg1/2 CDPK3      | 17            | aacttgacatccccatttac                                                                                               |
| Fw-pSag1::Cas9-U6::sg1 CDPK3        | 18            | gacgccagcctcgaaaaggggttttagagctagaaatagc                                                                           |
| Fw-pSag1::Cas9-U6::sg2 CDPK3        | 19            | tcagtccgtagttgggacaggttttagagctagaaatagc                                                                           |
| Fw-sg1CDPK3                         | 20            | gtaatacgactcactatagggcgaattgggtaccaagtaagc<br>agaagcacgct                                                          |
| Rv-sg1CDPK3                         | 21            | gtaaaagcttatcgataccgtcgacctcgagaattaaccctc<br>actaaagg                                                             |
| Fw-5'HXGPRT cassette at CDPK3 locus | 22            | ggagtcacgcctgagttga                                                                                                |
| Rv-5'HXGPRT cassette at CDPK3 locus | 23            | ggcctacgtgacttctgat                                                                                                |
| Fw-3'HXGPRT cassette at CDPK3 locus | 24            | cttcaatgggttggacgcc                                                                                                |
| Rv-3'HXGPRT cassette at CDPK3 locus | 25            | gaacaaagggggtcggctcat                                                                                              |
| Fw-CDPK3 locus absent check         | 26            | gcgcgttctcaggatgttctg                                                                                              |
| Rv-CDPK3 locus absent check         | 27            | cagtgtatctgcaacaaccaga                                                                                             |
